# Supplementary material for: Educational Attainment of Children Born with Unilateral Cleft Lip and Palate in the United Kingdom
Source: PubMed Central journal article supplement (PMC8044616; doi:10.1177/1055665620959989), 2020-09-29
Supplement: Supplemental_material.pdf [file Supplemental_material.pdf]

**Supplemental Table 5c:**

Association between exposure variables and the proportion of pupils achieving level 2 and above in mathematics as assessed using logistic regression odds ratios, 95% confidence intervals and p values. Model 1 adjusts for month of birth gender and model 2 also adjusting for the Index of Multiple Deprivation (IMD).

| Mathematics                                |                            |          |                                   |             |      |                                       |             |      |
|--------------------------------------------|----------------------------|----------|-----------------------------------|-------------|------|---------------------------------------|-------------|------|
| Variable/<br>Category                      |                            | Max<br>N | Model 1 (month of birth & gender) |             |      | Model 2 (month of birth, gender, IMD) |             |      |
|                                            |                            |          | OR                                | 95% CI      | P    | OR                                    | 95% CI      | P    |
| Dento-alveolar (vs excellent/good)         | Fair                       | 159      | 1.38                              | 0.41, 4.69  | 0.2  | 1.39                                  | 0.41, 4.74  | 0.2  |
|                                            | Poor/Very poor             |          | 3.69                              | 0.45, 30.55 |      | 3.87                                  | 0.47, 32.19 |      |
| Naso-labial appearance (vs excellent/good) | Fair                       | 193      | 1.35                              | 0.46, 3.98  | 0.8  | 1.32                                  | 0.44, 3.93  | 0.7  |
|                                            | Poor/Very poor             |          | 1.08                              | 0.20, 5.80  |      | 1.20                                  | 0.22, 6.56  |      |
| Decayed missing filled teeth (Dmft) (vs 0) | 1-3                        | 203      | 0.94                              | 0.29, 3.04  | 0.2  | 1.02                                  | 0.31, 3.35  | 0.3  |
|                                            | 4+                         |          | 0.49                              | 0.17, 1.47  |      | 0.54                                  | 0.17, 1.66  |      |
| Audiology (best ear) (vs normal hearing)   | Any hearing loss           | 164      | 0.67                              | 0.22, 2.07  | 0.5  | 0.69                                  | 0.22, 2.13  | 0.5  |
| Intelligibility (vs normal)                | Different but intelligible | 184      | 0.97                              | 0.23, 4.07  | 0.07 | 0.98                                  | 0.23, 4.17  | 0.1  |
|                                            | Just intelligible or less  |          | 0.28                              | 0.08, 1.00  |      | 0.34                                  | 0.09, 1.23  |      |
| Psychological                              | Low self-confidence        | 185      | 0.26                              | 0.70, 1.00  | 0.05 | 0.29                                  | 0.08, 1.09  | 0.07 |
|                                            | Child is bullied           | 189      | 2.02                              | 0.24, 16.66 | 0.5  | 2.28                                  | 0.26, 19.64 | 0.5  |
| Minimum number of problems (vs 0-1)        | 2                          | 205      | 1.78                              | 0.52, 6.05  | 0.2  | 1.78                                  | 0.52, 6.06  | 0.3  |
|                                            | 3-6                        |          | 0.43                              | 0.14, 1.28  |      | 0.46                                  | 0.15, 1.45  |      |
|                                            |                            |          |                                   |             |      |                                       |             |      |

**Supplemental Table 5d:**

Association between exposure variables and the proportion of pupils achieving level 2 and above in speaking and listening as assessed using logistic regression odds ratios, 95% confidence intervals and p values. Model 1 adjusts for month of birth gender and model 2 also adjusting for the Index of Multiple Deprivation (IMD).

| Speaking and listening                     |                            |          |                                   |            |        |                                       |            |        |
|--------------------------------------------|----------------------------|----------|-----------------------------------|------------|--------|---------------------------------------|------------|--------|
| Variable/<br>Category                      |                            | Max<br>N | Model 1 (month of birth & gender) |            |        | Model 2 (month of birth, gender, IMD) |            |        |
|                                            |                            |          | OR                                | 95% CI     | P      | OR                                    | 95% CI     | P      |
| Dento-alveolar (vs excellent/good)         | Fair                       | 159      | 0.66                              | 0.25, 1.72 | 0.8    | 0.66                                  | 0.25, 1.73 | 0.9    |
|                                            | Poor/Very poor             |          | 1.01                              | 0.29, 3.48 |        | 1.06                                  | 0.31, 3.67 |        |
| Naso-labial appearance (vs excellent/good) | Fair                       | 193      | 1.49                              | 0.66, 3.37 | 0.9    | 1.47                                  | 0.65, 3.33 | 0.9    |
|                                            | Poor/Very poor             |          | 0.76                              | 0.23, 2.48 |        | 0.79                                  | 0.23, 2.64 |        |
| Decayed missing filled teeth (Dmft) (vs 0) | 1-3                        | 203      | 0.55                              | 0.23, 1.33 | 0.02   | 0.59                                  | 0.24, 1.44 | 0.06   |
|                                            | 4+                         |          | 0.35                              | 0.14, 0.84 |        | 0.41                                  | 0.16, 1.04 |        |
| Audiology (best ear) (vs normal hearing)   | Any hearing loss           | 164      | 0.52                              | 0.21, 1.27 | 0.2    | 0.53                                  | 0.21, 1.31 | 0.2    |
| Intelligibility (vs normal)                | Different but intelligible | 184      | 0.37                              | 0.13, 1.03 | <0.001 | 0.36                                  | 0.13, 1.02 | <0.001 |
|                                            | Just intelligible or less  |          | 0.12                              | 0.04, 0.33 |        | 0.13                                  | 0.04, 0.37 |        |
| Psychological                              | Low self-confidence        | 185      | 0.59                              | 0.17, 2.05 | 0.4    | 0.60                                  | 0.17, 2.11 | 0.4    |
|                                            | Child is bullied           | 189      | 1.01                              | 0.26, 3.85 | >0.9   | 0.95                                  | 0.24, 3.81 | >0.9   |
| Minimum number of problems (vs 0-1)        | 2                          | 205      | 0.64                              | 0.27, 1.50 | 0.01   | 0.71                                  | 0.30, 1.70 | 0.02   |
|                                            | 3-6                        |          | 0.27                              | 0.10, 0.68 |        | 0.29                                  | 0.11, 0.77 |        |

### Supplemental Table 5e:

Association between exposure variables and the proportion of pupils achieving level 2 and above in Science as assessed using logistic regression odds ratios, 95% confidence intervals and p values. Model 1 adjusts for month of birth gender and model 2 also adjusting for the Index of Multiple Deprivation (IMD).

| Science                                    |                            |          |                                   |            |       |                                       |            |       |
|--------------------------------------------|----------------------------|----------|-----------------------------------|------------|-------|---------------------------------------|------------|-------|
| Variable/<br>Category                      |                            | Max<br>N | Model 1 (month of birth & gender) |            |       | Model 2 (month of birth, gender, IMD) |            |       |
|                                            |                            |          | OR                                | 95% CI     | P     | OR                                    | 95% CI     | P     |
| Dento-alveolar (vs excellent/good)         | Fair                       | 159      |                                   | 0.22, 2.45 | 0.4   | 0.75                                  | 0.22, 2.58 | 0.5   |
|                                            | Poor/Very poor             |          | 0.58                              | 0.15, 2.18 |       | 0.64                                  | 0.17, 2.45 |       |
| Naso-labial appearance (vs excellent/good) | Fair                       | 193      | 1.29                              | 0.47, 3.50 | 0.3   | 1.25                                  | 0.45, 3.46 | 0.4   |
|                                            | Poor/Very poor             |          | 0.39                              | 0.11, 1.38 |       | 0.46                                  | 0.12, 1.69 |       |
| Decayed missing filled teeth (Dmft) (vs 0) | 1-3                        | 203      | 0.34                              | 0.12, 0.94 | 0.05  | 0.40                                  | 0.14, 1.12 | 0.3   |
|                                            | 4+                         |          | 0.36                              | 0.12, 1.09 |       | 0.55                                  | 0.17, 1.77 |       |
| Audiology (best ear) (vs normal hearing)   | Any hearing loss           | 164      | 0.26                              | 0.10, 0.70 | 0.008 | 0.25                                  | 0.09, 0.71 | 0.009 |
| Intelligibility (vs normal)                | Different but intelligible | 184      | 0.77                              | 0.21, 2.80 | 0.01  | 0.78                                  | 0.21, 2.90 | 0.02  |
|                                            | Just intelligible or less  |          | 0.18                              | 0.06, 0.59 |       | 0.22                                  | 0.07, 0.76 |       |
| Psychological                              | Low self-confidence        | 185      | 0.87                              | 0.18, 4.34 | 0.9   | 0.94                                  | 0.18, 4.82 | 0.9   |
|                                            | Child is bullied           | 189      | 0.96                              | 0.20, 4.71 | >0.9  | 1.07                                  | 0.20, 5.77 | >0.9  |
| Minimum number of problems (vs 0-1)        | 2                          | 205      | 0.36                              | 0.13, 1.03 | 0.003 | 0.41                                  | 0.14, 1.22 | 0.02  |
|                                            | 3-6                        |          | 0.18                              | 0.06, 0.57 |       | 0.24                                  | 0.08, 0.77 |       |

Supplemental Figure 2

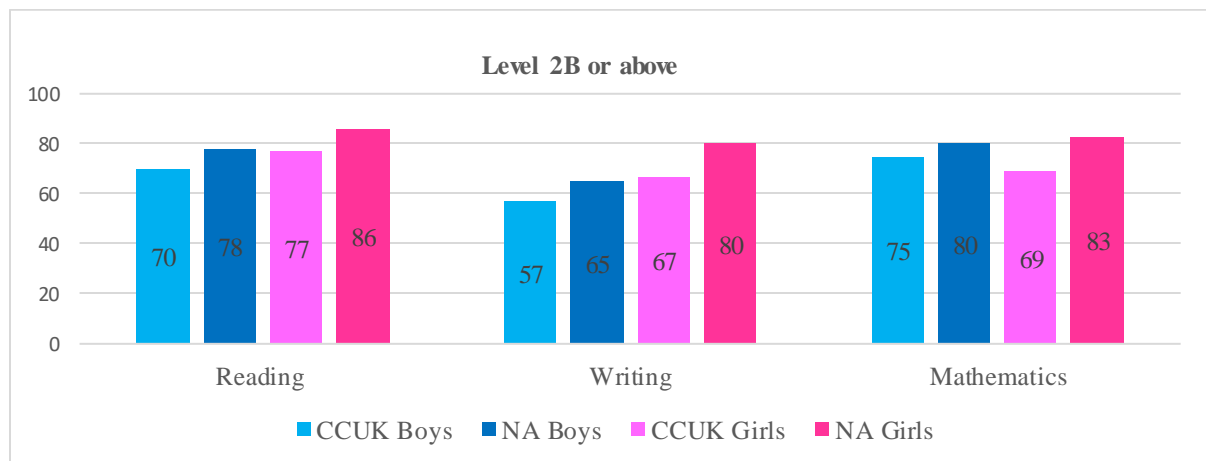

Supplemental Figure 2: Percentage of pupils scoring level 2B or above in Cleft Care UK (CCUK) vs the 2015 National Average (NA). Reading: Boys P=0.02 Girls

P=0.03, Writing: Boys P=0.05 Girls P= 0.01, Mathematics: Boys P= 0.1 Girls  
P=0.002
